# Supplementary material for: HRES-1/Rab4 Promotes the Formation of LC3+ Autophagosomes and the Accumulation of Mitochondria during Autophagy
Source: PubMed Central journal article supplement (PMC3880286; doi:10.1371/journal.pone.0084392), 2014-01-03

## LEGEND TO SUPPLEMENTARY FIGURE S1

Fig. S1. Flow cytometry detection of HRES-1/Rab4 isoforms, including wild-type HRES-1/Rab4, C-terminally truncated HRES-1/Rab4<sup>1-121</sup>, dominant-negative/GTP binding-deficient HRES-1/Rab4<sup>S27N</sup>, constitutively active/GTPase-deficient HRES-1/Rab4<sup>Q72L</sup> and phosphorylation-resistant form HRES-1/Rab4<sup>S204Q</sup>, tagged with eGFP and LC3 fused to FP650 (FP650-LC3). A) Flow cytometry of HeLa cells transfected with backbone vector pAAV-MCS and expression constructs producing HRES-1/Rab4-eGFP fusion proteins and eGFP alone. B, Flow cytometry of HeLa cells transfected with backbone vector pAAV-MCS, and expression vectors producing FP650-LC3 fusion protein and FP650 alone.

Figure S1

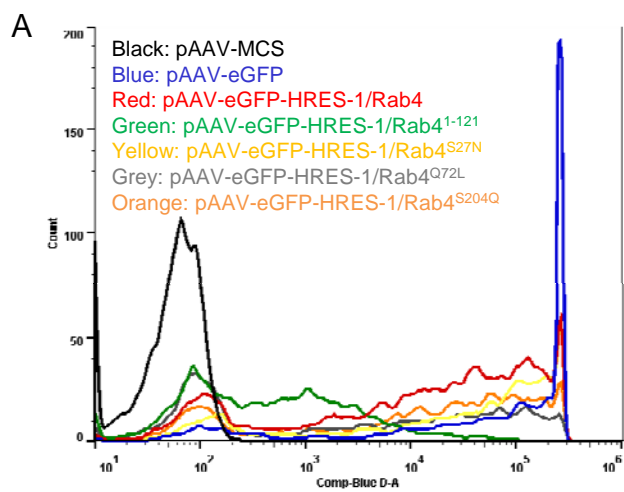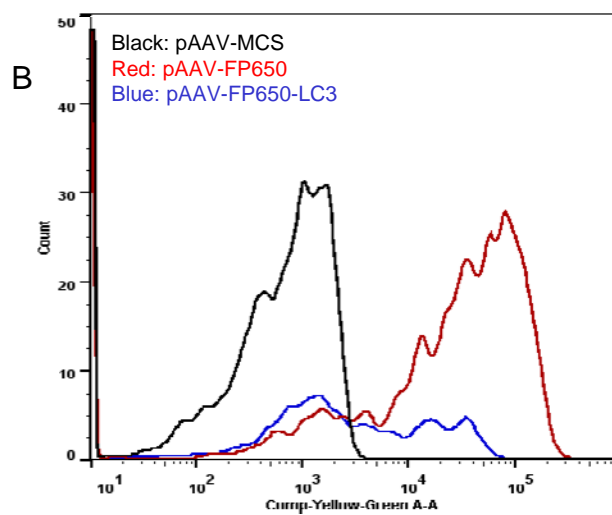

Supplement: pone.0084392.s001.pdf [file pone.0084392.s001.pdf]
